# Supplementary material
Source: PubMed Central journal article supplement (PMC4355538)
Supplement: MCB.01432-14_zmb999100775so1.pdf [file MCB.01432-14_zmb999100775so1.pdf]

**Table S1. Proteins significantly altered in neuroblastoma cells transfected with GIT2 siRNA.**

Protein Uniprot IDs are displayed that demonstrated a significant ( $>2$  SD from mean) expression alteration (siRNA<sub>GIT2</sub>/con) measured using a cross-over medium/heavy SILAC doublet experiment. An average normalized ratio of protein expression from siRNA GIT2 versus control (from the SILAC doublet label-swap) was log<sub>2</sub> transformed for data visualization (N ratio). The simple expression ratio of the specific protein after siRNA GIT2 treatment compared control cells is also indicated.

| Protein Description                                      | Uniprot ID | average log(N-ratio) | siRNA GIT2/con |
|----------------------------------------------------------|------------|----------------------|----------------|
| Nucleolar and coiled-body phosphoprotein 1               | Q14978-2   | 0.65                 | 1.57           |
| Putative uncharacterized protein CGI-59                  | C9JXK6     | 0.44                 | 1.36           |
| Neutral alpha-glucosidase AB                             | Q14697-1   | 0.43                 | 1.34           |
| Histone H3                                               | Q5TEC6     | 0.40                 | 1.32           |
| LDLR chaperone MESD                                      | Q14696     | 0.33                 | 1.26           |
| Phosducin-like protein 3                                 | Q9H2J4     | 0.27                 | 1.21           |
| Peroxiredoxin-4                                          | Q13162     | 0.26                 | 1.20           |
| Protein FAM3C                                            | Q92520     | 0.26                 | 1.20           |
| Sulfotransferase 1A1                                     | P50225     | 0.24                 | 1.18           |
| Succinate dehydrogenase [ubiquinone] iron-sulfur subunit | P21912     | 0.24                 | 1.18           |
| Tubulin-tyrosine ligase-like protein 12                  | Q14166     | 0.24                 | 1.18           |
| Aspartate aminotransferase, mitochondrial;Transaminase A | P00505     | 0.22                 | 1.17           |
| DERP12 (Dermal papilla derived protein 12)               | Q8TE01     | 0.21                 | 1.15           |
| Thymosin beta-4-like protein 3                           | Q0P5N8     | 0.21                 | 1.15           |
| Activator of 90 kDa heat shock protein ATPase homolog 1  | O95433     | 0.21                 | 1.15           |
| ATPase family AAA domain-containing protein 3A           | Q9NVI7-1   | 0.21                 | 1.15           |
| Density-regulated protein                                | C9JW58     | 0.20                 | 1.15           |
| Enhancer of mRNA-decapping protein 3                     | Q96F86     | 0.20                 | 1.15           |
| Oxidoreductin-1-L-alpha                                  | Q96HE7     | 0.20                 | 1.15           |
| Bisphosphate 3'-nucleotidase 1                           | O95861-2   | 0.20                 | 1.15           |
| Coiled-coil domain-containing protein 124                | Q96CT7     | 0.20                 | 1.15           |
| Leucine aminopeptidase 3                                 | P28838-1   | 0.19                 | 1.14           |
| Microtubule-associated protein 1B                        | P46821     | 0.19                 | 1.14           |
| Prefoldin subunit 4                                      | Q9NQP4     | 0.19                 | 1.14           |
| Mitochondrial ATP-dependent protease Lon                 | P36776     | 0.19                 | 1.14           |
| 60S ribosomal protein L14                                | P50914     | 0.19                 | 1.14           |
| Membrane-organizing extension spike protein              | P26038     | 0.18                 | 1.13           |
| Histone H3.1                                             | P68431     | 0.17                 | 1.12           |
| PHD finger-like domain-containing protein 5A             | Q7RTV0     | 0.18                 | 1.13           |

|                                                               |          |       |      |
|---------------------------------------------------------------|----------|-------|------|
| Signal recognition particle 14 kDa protein                    | P37108   | 0.18  | 1.13 |
| NAD(P) transhydrogenase, mitochondria                         | Q13423   | 0.18  | 1.13 |
| Creatine kinase U-type, mitochondrial                         | P12532-2 | 0.18  | 1.13 |
| 14-3-3 protein gamma                                          | P61981   | 0.17  | 1.13 |
| Laminin subunit gamma-1                                       | P11047   | 0.17  | 1.13 |
| Histone H4                                                    | P62805   | 0.17  | 1.13 |
| Eukaryotic translation initiation factor 3 subunit F          | B3KSH1   | 0.17  | 1.13 |
| TRAF6-regulated IKK activator 1 beta Uev1A                    | Q13404-4 | -0.17 | 0.89 |
| Protein tyrosine phosphatase-like protein PTPLAD1             | Q9P035   | -0.17 | 0.89 |
| ADP-ribosylation factor 1                                     | P84077   | -0.17 | 0.89 |
| PEST proteolytic signal-containing nuclear protein            | Q8WW12-1 | -0.18 | 0.89 |
| High-mobility group box 1 variant                             | P09429   | -0.18 | 0.88 |
| 60S ribosomal protein L13a                                    | P40429   | -0.18 | 0.88 |
| Chromatin-modifying protein 2a                                | O43633   | -0.18 | 0.88 |
| Phosphofructokinase 1                                         | Q01813   | -0.18 | 0.88 |
| 70 kDa peroxisomal membrane protein                           | B4DL07   | -0.19 | 0.88 |
| High-mobility group nucleosome binding domain 1               | P05114   | -0.20 | 0.87 |
| 33 kDa VAMP-associated protein                                | A6NDZ0   | -0.20 | 0.87 |
| Core histone macro-H2A.1                                      | O75367-1 | -0.20 | 0.87 |
| Histone H2A type 1-B/E                                        | P04908   | -0.20 | 0.87 |
| Adenylyl cyclase-associated protein                           | B4DNA3   | -0.21 | 0.86 |
| Spinocerebellar ataxia type 10 protein                        | Q9UBB4   | -0.21 | 0.86 |
| ATP synthase subunit delta, mitochondrial                     | P30049   | -0.21 | 0.86 |
| Synaptobrevin-3                                               | Q15836   | -0.21 | 0.86 |
| Histone H2A type 1                                            | P0C0S8   | -0.22 | 0.86 |
| Mitochondrial import inner membrane translocase subunit TIM44 | O43615   | -0.22 | 0.86 |
| Guanine nucleotide binding protein (G protein), gamma 12      | Q9UBI6   | -0.22 | 0.86 |
| Nuclear pore complex protein Nup50                            | Q9UKX7   | -0.23 | 0.86 |
| Mediator of DNA damage checkpoint protein 1                   | Q14676-1 | -0.23 | 0.85 |
| Nuclear ubiquitous casein/cyclin-dependent kinases substrate  | Q9H1E3-1 | -0.23 | 0.85 |
| Fanconi anemia group I protein                                | Q9NVI1-3 | -0.23 | 0.85 |
| DnaJ homolog subfamily C member 8                             | O75937   | -0.24 | 0.85 |
| Histone H2A type 2-B                                          | Q8IUE6   | -0.25 | 0.84 |
| Neuron-specific enolase                                       | P09104   | -0.25 | 0.84 |
| Heterochromatin protein 1 homolog alpha                       | P45973   | -0.26 | 0.84 |
| 26S proteasome non-ATPase regulatory subunit 7                | P51665   | -0.28 | 0.82 |
| 14-3-3 protein eta                                            | Q04917   | -0.30 | 0.81 |
| Ras-related protein Rab-5B                                    | P61020   | -0.32 | 0.80 |
| Splicing factor, arginine/serine-rich 15                      | C9J1W7   | -0.32 | 0.80 |
| Peptidyl-prolyl cis-trans isomerase FKBP8                     | Q14318-2 | -0.42 | 0.75 |

**Table S2. GO term analysis of GIT2 siRNA-modulated proteins.** Gene Ontology (GO) term enrichment analysis was performed using standard GO-term biological process algorithms with WebGestalt (version 2). GO term IDs, number of observed enriched proteins (Observed) and enrichment probability ( $p < 0.05$ ) value ( $p$  value) is indicated for each significantly-enriched GO term.

| <b>GO term description</b>                           | <b>GO term ID</b> | <b>Observed</b> | <b><i>p</i> value</b> |
|------------------------------------------------------|-------------------|-----------------|-----------------------|
| cellular response to stress                          | GO:0033554        | 8               | 0.0296                |
| protein-DNA complex assembly                         | GO:0065004        | 5               | 0.0055                |
| chromatin assembly                                   | GO:0031497        | 4               | 0.0138                |
| nucleosome assembly                                  | GO:0006334        | 4               | 0.0119                |
| purine ribonucleoside triphosphate catabolic process | GO:0009207        | 2               | 0.0303                |
| glucose catabolic process                            | GO:0006007        | 3               | 0.0307                |
| glycolysis                                           | GO:0006096        | 3               | 0.0256                |
| acetyl-CoA catabolic process                         | GO:0046356        | 2               | 0.0367                |
| ATP catabolic process                                | GO:0006200        | 2               | 0.0256                |
| I-kappaB kinase/NF-kappaB cascade                    | GO:0007249        | 4               | 0.0367                |

**Table S3. Proteins significantly altered in cells transfected with Flag-GIT2 cDNA.** Protein Uniprot IDs are displayed that demonstrated a significant (>2 SD from mean) expression alteration (F-GIT2/con) measured using a cross-over medium/heavy SILAC doublet experiment. An average normalized ratio of protein expression from siRNA GIT2 versus control (from the SILAC doublet label-swap) was log<sub>2</sub> transformed for data visualization (N-ratio). The simple expression ratio of the specific protein after siRNA GIT2 treatment compared control cells is also indicated.

| Protein Description                                       | Uniprot ID | Average log(N-ratio) | F-GIT2/con |
|-----------------------------------------------------------|------------|----------------------|------------|
| Isoform 2 of C-terminal-binding protein 2                 | P56545-2   | 1.64                 | 3.11       |
| Dermal papilla derived protein 12                         | Q8TE01     | 1.35                 | 2.56       |
| Gastric-associated differentially-expressed protein YA61P | Q9NZ23     | 1.14                 | 2.20       |
| G2/mitotic-specific cyclin-B1                             | P14635     | 0.75                 | 1.68       |
| Isoform Long of Antigen KI-67                             | P46013-1   | 0.71                 | 1.63       |
| Aspartate aminotransferase, mitochondrial                 | P00505     | 0.42                 | 1.34       |
| Histone H3                                                | Q5TEC6     | 0.35                 | 1.27       |
| Isoform 1 of Proteasome subunit alpha type-3              | P25788-1   | 0.33                 | 1.26       |
| Kinesin family member 2C                                  | Q99661-1   | 0.33                 | 1.26       |
| Eukaryotic translation initiation factor 3 subunit H      | B3KS98     | 0.32                 | 1.25       |
| Histone H3.1                                              | P68431     | 0.32                 | 1.25       |
| Histone H4                                                | P62805     | 0.31                 | 1.24       |
| Transmembrane protein 165                                 | Q9HC07     | 0.29                 | 1.22       |
| zinc finger protein 207 isoform c                         | Q59G94     | 0.29                 | 1.22       |
| Squalene synthetase                                       | P37268     | 0.28                 | 1.21       |
| Ubiquitin-conjugating enzyme E2 S                         | Q16763     | 0.28                 | 1.21       |
| DNA topoisomerase 1                                       | P11387     | 0.28                 | 1.21       |
| Isoform 2 of Transcription elongation factor SPT5         | O00267-1   | 0.27                 | 1.21       |
| FUS interacting protein (Serine/arginine-rich) 1          | O75494-1   | 0.27                 | 1.21       |
| Isoform 1 of Minor histocompatibility antigen H13         | Q8TCT9-1   | 0.27                 | 1.20       |
| Non-histone chromosomal protein HMG-17                    | P05204     | 0.27                 | 1.20       |
| Eukaryotic translation initiation factor 1                | P41567     | 0.27                 | 1.20       |
| Protein tyrosine phosphatase-like protein PTPLAD1         | Q9P035     | 0.26                 | 1.20       |
| Msx2-interacting protein                                  | Q96T58     | 0.26                 | 1.20       |
| Isoform 1 of Replication factor C subunit 1               | P35251-1   | 0.25                 | 1.19       |
| Asparagine synthetase [glutamine-hydrolyzing]             | P08243     | 0.25                 | 1.19       |
| Isoform 4 of 4F2 cell-surface antigen heavy chain         | P08195-4   | 0.25                 | 1.19       |
| Isoform 1 of Golgin subfamily A member 3                  | Q08378-1   | 0.24                 | 1.18       |
| Non-histone chromosomal protein HMG-14                    | A6NEL0     | 0.23                 | 1.18       |

|                                                               |          |       |      |
|---------------------------------------------------------------|----------|-------|------|
| Isoform 2 of Kinesin-like protein KIF23                       | A8MTR8   | 0.23  | 1.17 |
| Isoform 2 of RNA-binding protein 10                           | P98175-1 | 0.23  | 1.17 |
| Isoform 2 of Putative ribosomal RNA methyltransferase NOP2    | A8MQ38   | 0.23  | 1.17 |
| Transcription factor A, mitochondrial                         | Q00059   | 0.22  | 1.17 |
| Isoform 1 of Erlin-2                                          | O94905-1 | 0.22  | 1.16 |
| Isoform 1 of Nucleolar RNA helicase 2                         | Q9NR30-1 | 0.21  | 1.15 |
| 39S ribosomal protein L10, mitochondrial                      | A6NGJ4   | 0.20  | 1.15 |
| mRNA turnover protein 4 homolog                               | Q9UKD2   | 0.20  | 1.15 |
| Isoform 1 of Surfeit locus protein 4                          | O15260-1 | 0.19  | 1.14 |
| Isoform 1 of H/ACA ribonucleoprotein complex subunit 1        | Q9NY12-1 | 0.18  | 1.14 |
| Isoform 1 of Tryptophanyl-tRNA synthetase                     | P23381-1 | 0.18  | 1.14 |
| Isoform 1 of Far upstream element-binding protein 1           | B4DT31   | 0.18  | 1.13 |
| Isoform 2 of UPF0488 protein C8orf33                          | Q9H7E9-2 | 0.18  | 1.13 |
| Uncharacterized protein C7orf50                               | Q9BRJ6   | 0.18  | 1.13 |
| Dolichyl-diphosphooligosaccharide-protein glycosyltransferase | P46977   | 0.18  | 1.13 |
| Palmitoyl-protein thioesterase 1                              | Q5T0S6   | 0.18  | 1.13 |
| Isoform 5 of AP-3 complex subunit delta-1                     | O14617-5 | -0.17 | 0.89 |
| Prolyl endopeptidase                                          | P48147   | -0.17 | 0.89 |
| Serpin B6                                                     | B2RBA8   | -0.17 | 0.89 |
| Isoform 1 of Kinectin                                         | Q86UP2-1 | -0.18 | 0.89 |
| Acetyl-CoA acetyltransferase, cytosolic                       | Q9BWD1   | -0.18 | 0.88 |
| Isoform Long of Glucose-6-phosphate 1-dehydrogenase           | P11413-2 | -0.18 | 0.88 |
| Golgin B1                                                     | B2ZZ91   | -0.19 | 0.88 |
| Isocitrate dehydrogenase [NADP] cytoplasmic                   | O75874   | -0.19 | 0.88 |
| Condensin complex subunit 3                                   | Q9BPX3   | -0.19 | 0.88 |
| Long-chain-fatty-acid-CoA ligase 3                            | O95573   | -0.19 | 0.88 |
| 26S proteasome non-ATPase regulatory subunit 12               | O00232   | -0.21 | 0.86 |
| Importin-9                                                    | Q96P70   | -0.22 | 0.86 |
| Brix domain-containing protein 2                              | Q8TDN6   | -0.24 | 0.85 |
| Tubulin-specific chaperone E                                  | B7Z3P1   | -0.27 | 0.83 |
| WW domain-binding protein 11                                  | Q9Y2W2   | -0.34 | 0.79 |
| Nucleolar protein 56                                          | O00567   | -0.52 | 0.70 |
| Membrane-associated progesterone receptor component 2         | O15173   | -0.56 | 0.68 |
| Casein kinase 2, beta polypeptide                             | Q5SRQ6   | -0.64 | 0.64 |
| UPF0727 protein C6orf115                                      | Q9P1F3   | -1.13 | 0.46 |
| Isoform 1 of Titin                                            | Q8WZ42-8 | -1.19 | 0.44 |

**Table S4. GO term analysis of Flag-GIT2-modulated proteins.** Gene Ontology (GO) term enrichment analysis was performed using standard GO-term biological process algorithms with WebGestalt (version 2). GO term IDs, number of observed enriched proteins (Observed) and enrichment probability ( $p < 0.05$ ) value ( $p$  value) is indicated for each significantly-enriched GO term.

| <b>GO term description</b>                       | <b>GO term ID</b> | <b>Observed</b> | <b><math>p</math> value</b> |
|--------------------------------------------------|-------------------|-----------------|-----------------------------|
| cell cycle                                       | GO:0007049        | 9               | 0.0052                      |
| ribonucleoprotein complex biogenesis             | GO:0022613        | 5               | 0.0045                      |
| RNA processing                                   | GO:0006396        | 5               | 0.0454                      |
| nuclear division                                 | GO:0000280        | 4               | 0.0199                      |
| ncRNA processing                                 | GO:0034470        | 3               | 0.0477                      |
| chromosome condensation                          | GO:0030261        | 2               | 0.0304                      |
| DNA-dependent DNA replication                    | GO:0006261        | 2               | 0.0491                      |
| proteasomal protein catabolic process            | GO:0010498        | 3               | 0.0176                      |
| regulation of ubiquitin-protein ligase activity  | GO:0051438        | 3               | 0.0096                      |
| aspartate family amino acid biosynthetic process | GO:0009067        | 2               | 0.0095                      |

**Table S5. Functional Network Analysis of total siRNA/FLAG-GIT2 modulated proteins.**

Functional networks of the GIT2-regulated proteins were created using Ingenuity Pathway Analysis (IPA). Focus molecules represent the proteins that meet the applied statistical cutoffs ( $p < 0.05$ ) and map to the Global Molecular Network sets from IPA.

| <b>Network Number</b> | <b>Functions</b>                                  | <b>Network Score</b> | <b>Focus Molecules</b>      |
|-----------------------|---------------------------------------------------|----------------------|-----------------------------|
| 1                     | <i>Cellular Assembly and Organization</i>         | 66                   | ABCD3                       |
|                       | <i>Cellular Function and Maintenance</i>          |                      | ASNS                        |
|                       | <i>DNA Replication, Recombination, and Repair</i> |                      | BRIX1                       |
|                       |                                                   |                      | CBX5                        |
|                       |                                                   |                      | CCNB1                       |
|                       |                                                   |                      | FANCI                       |
|                       |                                                   |                      | FDFT1                       |
|                       |                                                   |                      | FKBP8                       |
|                       |                                                   |                      | H2AFY                       |
|                       |                                                   |                      | HIST1H2AB/HIST1H2AE         |
|                       |                                                   |                      | HIST1H2AG (includes others) |
|                       |                                                   |                      | HIST1H3A (includes others)  |
|                       |                                                   |                      | HIST1H4A (includes others)  |
|                       |                                                   |                      | HMGN1                       |
|                       |                                                   |                      | HMGN2                       |
|                       |                                                   |                      | MKI67                       |
|                       |                                                   |                      | NOLC1                       |
|                       |                                                   |                      | NOP2                        |
|                       |                                                   |                      | NOP56                       |
|                       |                                                   |                      | PRDX4                       |
|                       |                                                   |                      | PTPLAD1                     |
|                       |                                                   |                      | RPL14                       |
|                       |                                                   |                      | SRP14 (includes EG:20813)   |
|                       |                                                   |                      | TMSB10/TMSB4X               |
|                       |                                                   |                      | TOP1                        |
|                       |                                                   |                      | UBE2V1                      |
|                       |                                                   |                      |                             |
| 2                     | <i>Cellular Assembly and Organization</i>         | 57                   | ARF1                        |
|                       | <i>Cellular Function and Maintenance</i>          |                      | CAP1                        |
|                       | <i>Cellular Compromise</i>                        |                      | CSNK2B                      |
|                       |                                                   |                      | EDC3 (includes EG:315708)   |
|                       |                                                   |                      | EIF3F                       |
|                       |                                                   |                      | EIF3H                       |
|                       |                                                   |                      | HMGB1                       |
|                       |                                                   |                      | KIF23                       |
|                       |                                                   |                      |                             |

|   |                                                     |    |                         |
|---|-----------------------------------------------------|----|-------------------------|
|   |                                                     |    | KIF2C                   |
|   |                                                     |    | LOC100505793/SRSF10     |
|   |                                                     |    | LONP1                   |
|   |                                                     |    | MAP1B                   |
|   |                                                     |    | MSN                     |
|   |                                                     |    | PFDN4                   |
|   |                                                     |    | PSMA3                   |
|   |                                                     |    | PSMD7                   |
|   |                                                     |    | PSMD12                  |
|   |                                                     |    | RFC1                    |
|   |                                                     |    | SLC3A2                  |
|   |                                                     |    | TBCE                    |
|   |                                                     |    | TTN (includes EG:22138) |
|   |                                                     |    | VAPA                    |
|   |                                                     |    | WBP11                   |
|   |                                                     |    | YWHAG                   |
|   |                                                     |    | YWHAH                   |
|   |                                                     |    | ZNF207                  |
|   |                                                     |    |                         |
| 3 | <i>Cancer</i>                                       | 29 | AHSA1                   |
|   | <i>Cell Cycle</i>                                   |    | ATXN10                  |
|   | <i>Hair and Skin Development and Function</i>       |    | C6orf115                |
|   |                                                     |    | DENR                    |
|   |                                                     |    | ENO2                    |
|   |                                                     |    | HM13                    |
|   |                                                     |    | MESDC2                  |
|   |                                                     |    | PCNP                    |
|   |                                                     |    | PFKP                    |
|   |                                                     |    | RAB5B                   |
|   |                                                     |    | RBM10                   |
|   |                                                     |    | SDHB                    |
|   |                                                     |    | SULT1A1                 |
|   |                                                     |    | SUPT5H                  |
|   |                                                     |    | TTLL12                  |
|   |                                                     |    |                         |
| 4 | <i>Cell Cycle</i>                                   | 20 | ATAD3A/ATAD3B           |
|   | <i>Reproductive System Development and Function</i> |    | ATP5D                   |
|   | <i>Gene Expression</i>                              |    | FAM3C                   |
|   |                                                     |    | GANAB                   |
|   |                                                     |    | HIST2H2AB               |
|   |                                                     |    | IPO9                    |
|   |                                                     |    | MDC1                    |
|   |                                                     |    | NNT                     |
|   |                                                     |    | PHF5A                   |
|   |                                                     |    | SPEN                    |
|   |                                                     |    | UBE2S                   |



|   |                                                              |    |               |
|---|--------------------------------------------------------------|----|---------------|
|   |                                                              |    | VAMP3         |
|   |                                                              |    |               |
|   |                                                              |    |               |
| 5 | <i>Cell Signaling</i>                                        | 17 | BPNT1         |
|   | <i>Molecular Transport</i>                                   |    | CHMP2A        |
|   | <i>Vitamin and Mineral Metabolism</i>                        |    | CKMT1A/CKMT1B |
|   |                                                              |    | EIF1          |
|   |                                                              |    | GNG12         |
|   |                                                              |    | GOLGA3        |
|   |                                                              |    | LAMC1         |
|   |                                                              |    | LAP3          |
|   |                                                              |    | PGRMC2        |
|   |                                                              |    | TIMM44        |
|   |                                                              |    |               |
| 6 | <i>Cell Cycle</i>                                            | 15 | CCDC124       |
|   | <i>Skeletal and Muscular System Development and Function</i> |    | CTBP2         |
|   | <i>Organ Morphology</i>                                      |    | DNAJC8        |
|   |                                                              |    | ERO1L         |
|   |                                                              |    | GOT2          |
|   |                                                              |    | PDCL3         |
|   |                                                              |    | PFKL          |
|   |                                                              |    | SCAF4         |
|   |                                                              |    | TMEM165       |

**Table S6. IPA Canonical Signaling Pathway analysis of total combined siRNA/FLAG-GIT2 modulated proteins.** Canonical signaling pathway analysis was performed upon the total complement of GIT2 ‘constellation’ proteins significantly affected by either GIT2 expression potentiation or reduction. For significant population of a specific canonical signaling pathway, at least two inclusive proteins were required, with an enrichment probability of <0.05.

| Canonical Signaling Pathways                      | -log(p-value) | Ratio    | Proteins                               |
|---------------------------------------------------|---------------|----------|----------------------------------------|
| Cell Cycle: G2/M DNA Damage Checkpoint Regulation | 2.68E+00      | 6.12E-02 | YWHAG,YWHAH,CCNB1                      |
| ATM Signaling                                     | 2.36E+00      | 5.08E-02 | MDC1,CBX5,CCNB1                        |
| EIF2 Signaling                                    | 2.32E+00      | 2.44E-02 | EIF3H,EIF3F,EIF1,RPL14,RPL13A          |
| Protein Ubiquitination Pathway                    | 2.43E+00      | 2.23E-02 | PSMA3,PSMD7,DNAJC8,PSMD12,UBE2V1,UBE2S |
| IGF-1 Signaling                                   | 1.72E+00      | 2.83E-02 | YWHAG,YWHAH,CSNK2B                     |
| Myc Mediated Apoptosis Signaling                  | 1.34E+00      | 3.28E-02 | YWHAG,YWHAH                            |
| Role of BRCA1 in DNA Damage Response              | 1.33E+00      | 3.08E-02 | MDC1,RFC1                              |
| ERK5 Signaling                                    | 1.30E+00      | 3.12E-02 | YWHAG,YWHAH                            |
| Mitotic Roles of Polo-Like Kinase                 | 1.30E+00      | 3.08E-02 | KIF23,CCNB1                            |
| Hypoxia Signaling in the Cardiovascular System    | 1.28E+00      | 3.08E-02 | UBE2V1,UBE2S                           |
| Huntington's Disease Signaling                    | 1.44E+00      | 1.69E-02 | SDHB,VAMP3,UBE2S,GNG12                 |
| Actin Cytoskeleton Signaling                      | 1.44E+00      | 1.66E-02 | TMSB10/TMSB4X,TTN,GNG12,MSN            |
| Regulation of eIF4 and p70S6K Signaling           | 1.26E+00      | 1.70E-02 | EIF3H,EIF3F,EIF1                       |
