# Supplementary material
Source: PubMed Central journal article supplement (PMC4355538)
Supplement: MCB.01432-14_zmb999100775so5.pdf [file MCB.01432-14_zmb999100775so5.pdf]

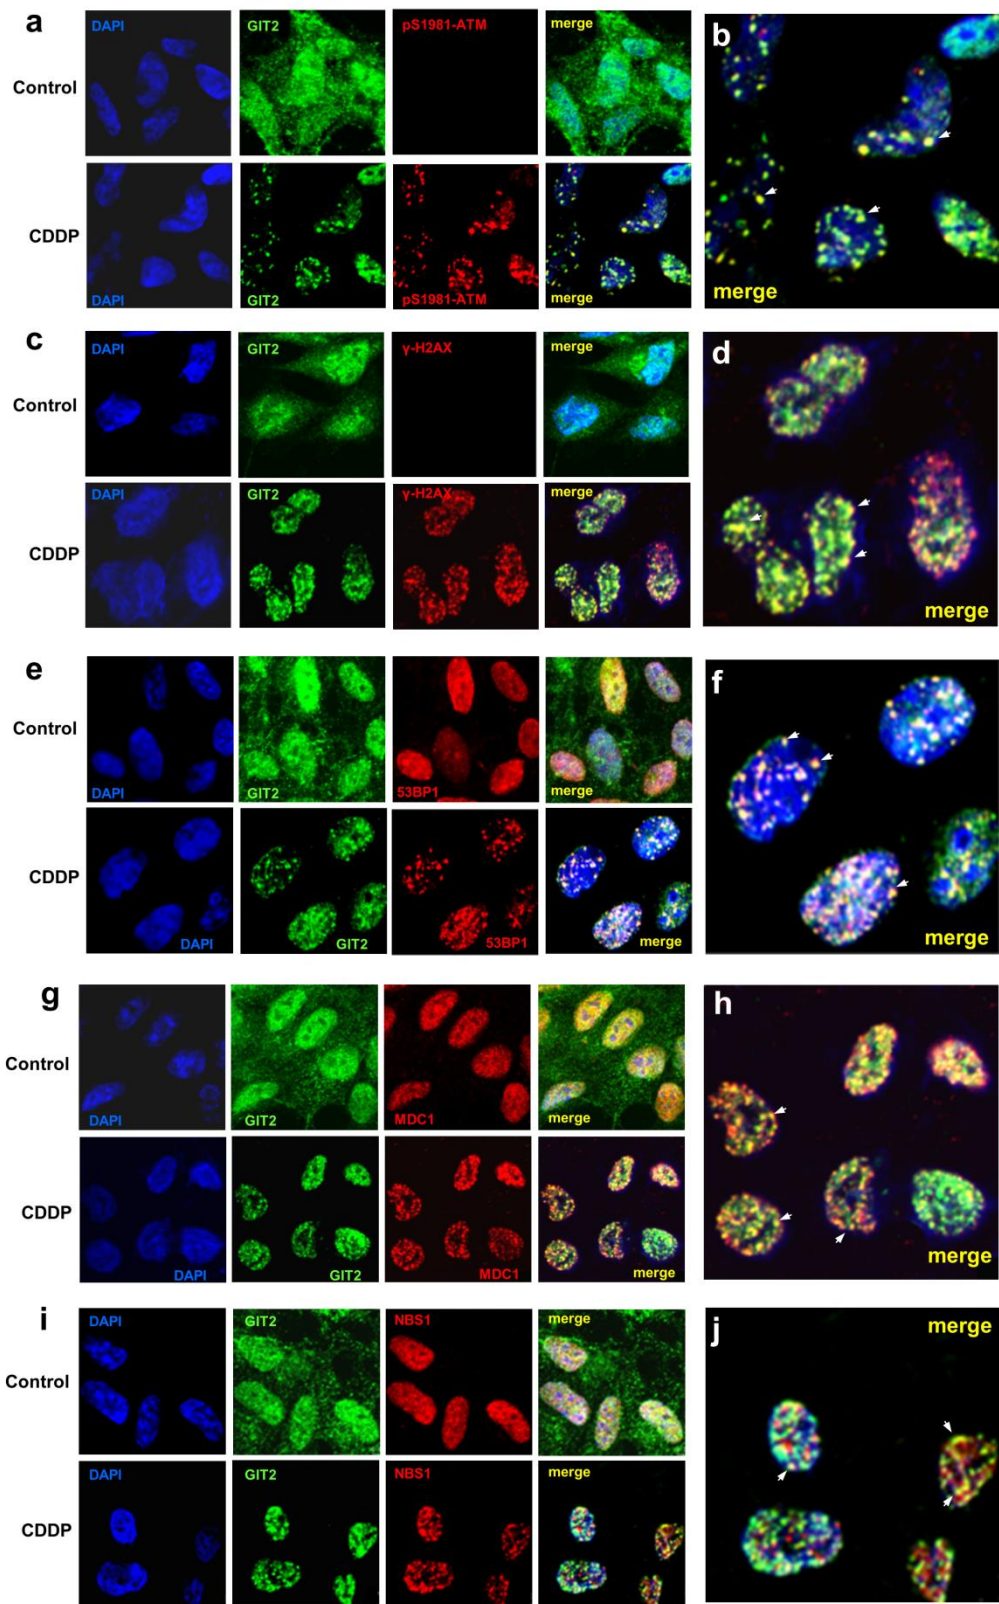

**Figure S4. DNA damage induced GIT2 nuclear foci formation with classical DNA-damage response factors.** SH-SY5Y cells were treated with CDDP, fixed and then the subcellular localizations and co-localization of endogenous GIT2 with active ATM-pS1981 (a, merge enlargement b),  $\gamma$ -H2AX (c, merge enlargement d), 53BP1 (e, merge enlargement f), MDC1 (g, merge enlargement h) and NBS1 (i, merge enlargement j) was assessed. Co-localizations are indicated with white arrows. GIT2 or the DNA damage complex proteins were detected (63 $\times$  magnification) using specific primary antibodies followed by an Alexa Fluor 488 (green)-or Alexa Fluor 568 (red)-conjugated secondary antibody, respectively. Nuclear DAPI stain was employed to visualize cellular nuclei.
