# Supplementary material
Source: PubMed Central journal article supplement (PMC4355538)
Supplement: MCB.01432-14_zmb999100775so6.pdf [file MCB.01432-14_zmb999100775so6.pdf]

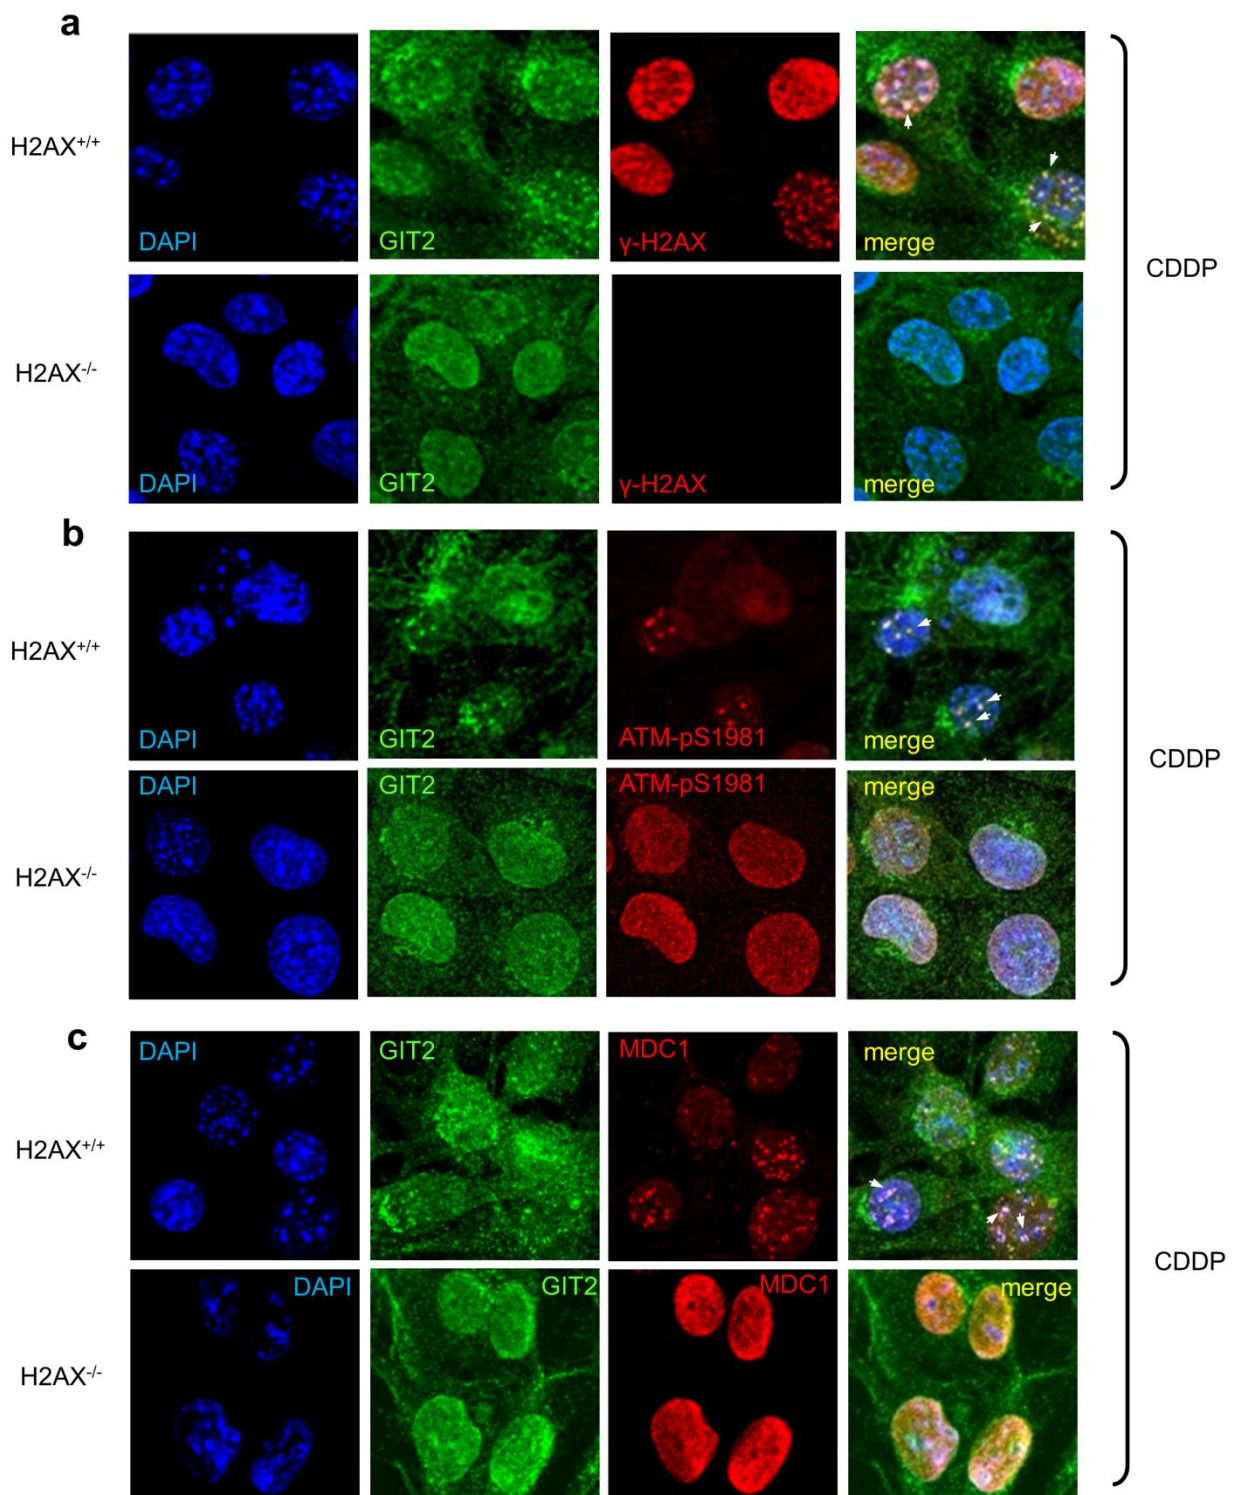

**Figure S5. DNA damage fails to generate GIT2-positive nuclear foci in H2AX<sup>-/-</sup> cells.** GIT2 forms nuclear foci (indicated with white arrows) that co-localize with  $\gamma$ -H2AX (a), active ATM (b) or MDC1 (c) in CDDP-treated H2AX<sup>+/+</sup> but not H2AX<sup>-/-</sup> cells. Immunocytochemical foci were detected (63x magnification) using antibodies against GIT2,  $\gamma$ -H2AX, ATM-pS1981 and MDC1 followed by an Alexa Fluor 488 (green)-or Alexa Fluor 568 (red)-conjugated secondary antibody, respectively. Nuclear DAPI stain was employed to visualize cellular nuclei.
