# Supplementary material
Source: PubMed Central journal article supplement (PMC4355538)
Supplement: MCB.01432-14_zmb999100775so7.pdf [file MCB.01432-14_zmb999100775so7.pdf]

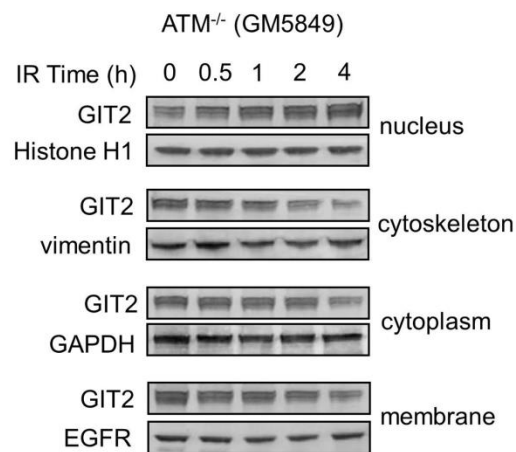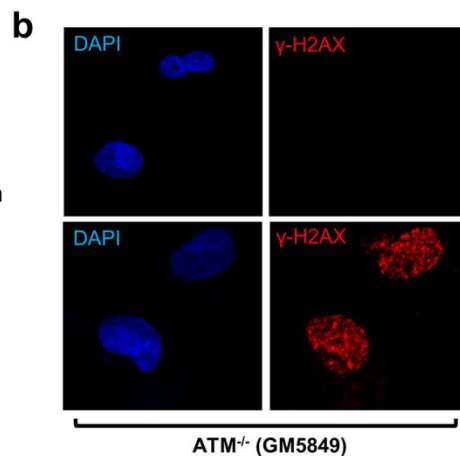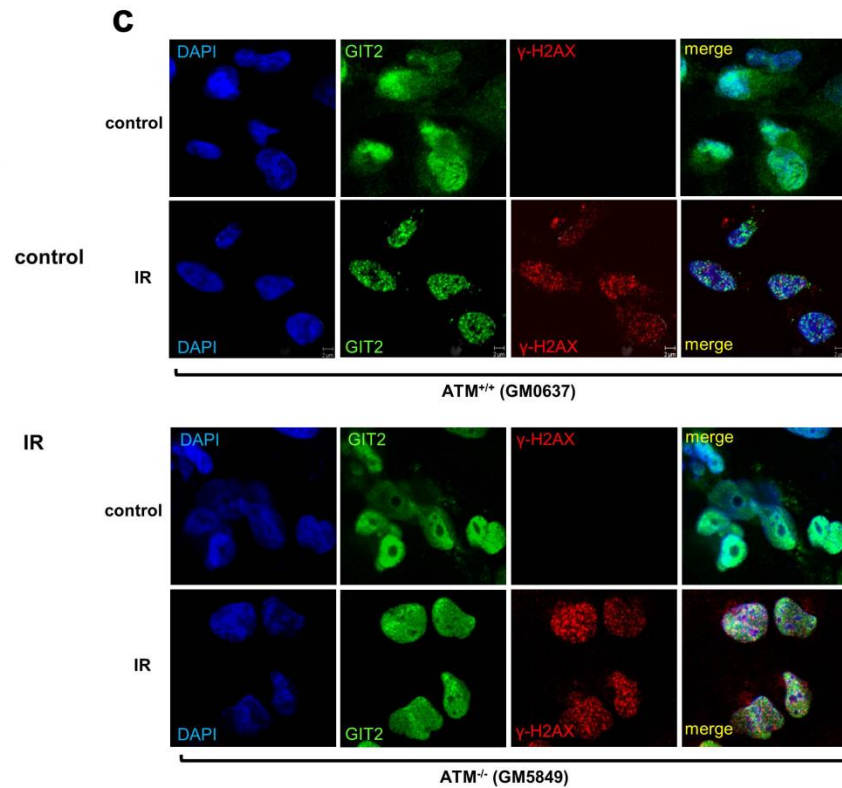

**Figure S6. GIT2 DSB recruitment is sensitive to modulation of ATM and H2AX activity status.** GIT2 DSB initial recruitment requires the presence of ATM kinase but not kinase activity. **(a)** IR-mediated DSBs induces GIT2 cellular re-distribution in ATM<sup>-/-</sup> (GM5849) cells. **(b)** Genomic deletion of ATM in GM5849 cells does not prevent IR-induced  $\gamma$ -H2AX foci formation. **(c)** GIT2 forms IR-dependent nuclear foci in ATM<sup>+/+</sup> cells (GM0637) but not in ATM<sup>-/-</sup> (GM5849) cells.
